# Supplementary material for: Statistical Mechanics Provides Novel Insights into Microtubule Stability and Mechanism of Shrinkage
Source: PLOS journal article supplement (doi:10.1371/journal.pcbi.1004099), 2015-02-18
Supplement: S10 (10.1371/journal.pcbi.1004099.s010) [file journal.pcbi.1004099.s010]

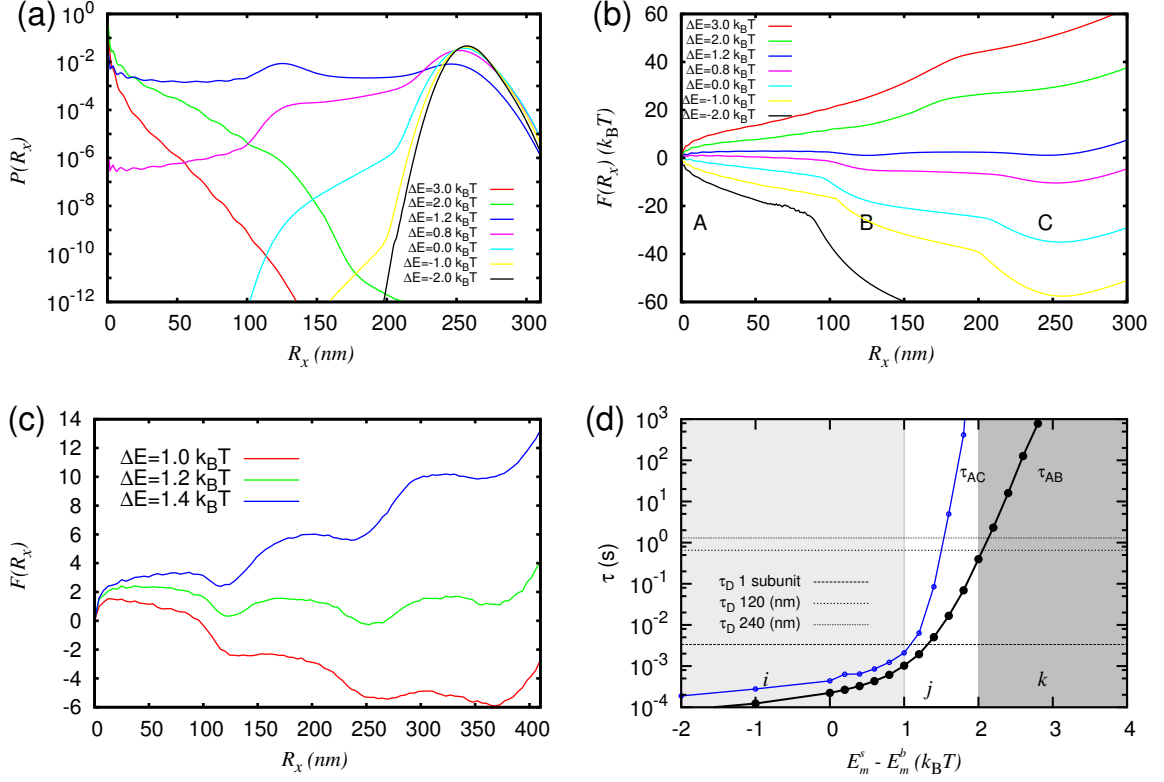

**Fig. S4.  $P(R_x)$ ,  $F(R_x)$ , and unzipping timescales.** (a) and (b) are  $P(R_x)$  and  $F(R_x)$ , respectively, for various value of  $\Delta E$ , where  $E_m^s$  is kept fixed at  $8.0k_B T$  and  $L = 34b$ . (c) Multiple minima in the free energy can be seen at all values of  $R_x = n2\pi r_c$  (see main text) even for a larger length of  $L = 49b$ . Here the free energy is computed using the pavement method as in Text S2. (d) Unzipping timescale from state A to state B ( $\tau_{AB}$ ) and from state A to state C ( $\tau_{AC}$ ) for various value of  $\Delta E$ ; here  $E_s^m$  is kept fixed at  $8.0k_B T$  and  $L = 34b$ .
